# Supplementary material for: Antibacterial and Antiviral Properties of Chenopodin-Derived Synthetic Peptides
Source: MDPI journal article supplement (doi:10.3390/antibiotics13010078), 2024-01-14
Supplement: s1 [file s1]

## Supplementary Material

### Antibacterial and antiviral properties of Chenopodin-derived synthetic peptides

**Table S1:** Prediction of the antimicrobial activity of Chenopodin-derived peptides using Ampfun software.

| ID    | AMP    | Antiparasitic | Antiviral | Anticancer | Targeting mammals | Antifugal | Gram + bacteria | Gram - bacteria |
|-------|--------|---------------|-----------|------------|-------------------|-----------|-----------------|-----------------|
| Chen1 | 0.9633 | 0.1182        | 0.625     | 0.1581     | 0.0667            | 0.4678    | 0.675           | 0.5362          |
| Chen2 | 0.997  | 0.0545        | 0.5833    | 0.1925     | 0.0667            | 0.7167    | 0.8083          | 0.6232          |
| ChenR | 0.9884 | 0.1           | 0.5667    | 0.1648     | 0.1               | 0.5763    | 0.7583          | 0.5362          |
| ChenW | 0.9829 | 0.0636        | 0.5917    | 0.1058     | 0.0667            | 0.3664    | 0.6833          | 0.7213          |

**Table S2:** Prediction of the antimicrobial activity of Chenopodin-derived peptides by AMP Scanner ([www.ampscanner.com](http://www.ampscanner.com).) software.

| ID    | Predicted Class | Prediction Probability* |
|-------|-----------------|-------------------------|
| Chen1 | Non-AMP         | 0.1207                  |
| Chen2 | AMP             | 0.9718                  |
| ChenR | AMP             | 0.9358                  |
| ChenW | AMP             | 0.9872                  |

\*> 0.5 = Predicted AMP

**Table S3:** Prediction of the haemotoxicity of peptides derived from Chenopodin protein by HAPPENN.

| ID    | Predicted probability |
|-------|-----------------------|
| Chen1 | 0.007                 |
| Chen2 | 0.003                 |
| ChenR | 0.004                 |
| ChenW | 0.010                 |

**Table S4:** Prediction of the haemotoxicity of Chenopodin-derived peptides by Hlppred-fuse.

| ID    | High or low | Predicted probability of High |
|-------|-------------|-------------------------------|
| Chen1 | Low         | 0.341666666667                |
| Chen2 | Low         | 0.384375                      |
| ChenR | Low         | 0.384375                      |

|              |             |                |
|--------------|-------------|----------------|
| <b>ChenW</b> | <b>High</b> | 0.539583333333 |
|--------------|-------------|----------------|

**Table S5:** Prediction of the haemotoxicity of Chenopodin-derived peptides by HemoPred.

| <b>ID</b>    | <b>Status</b> |
|--------------|---------------|
| <b>Chen1</b> | Non-hemolytic |
| <b>Chen2</b> | Hemolytic     |
| <b>ChenR</b> | Non-hemolytic |
| <b>ChenW</b> | Non-hemolytic |

**Table S6:** Prediction of the potential antiviral effect of Chenopodin-derived peptides by AI4AVP.

| <b>ID</b>    | <b>Score</b> | <b>Prediction Results*</b> |
|--------------|--------------|----------------------------|
| <b>Chen1</b> | 0.981        | YES                        |
| <b>Chen2</b> | 0.918        | YES                        |
| <b>ChenR</b> | 0.991        | YES                        |
| <b>ChenW</b> | 0.996        | YES                        |

\*Yes: Peptide is classified as an antiviral peptide.

**Table S7:** Prediction of the secondary structure of Chenopodin-derived peptides by PED2D.

| <b>ID</b>    | <b>Secondary Structure</b> | <b>Helix %age(H)</b> | <b>Sheet %age(E)</b> | <b>Coil %age(C)</b> |
|--------------|----------------------------|----------------------|----------------------|---------------------|
| <b>Chen1</b> | CCCCCCCCCEEHCCC            | 7.14                 | 14.29                | 78.57               |
| <b>Chen2</b> | CCEECECECCCCC              | 0.00                 | 35.71                | 64.29               |
| <b>ChenR</b> | CCCCCCCCCEECCCC            | 0.00                 | 14.29                | 85.71               |
| <b>ChenW</b> | CCCCCCCCEEEECEC            | 0.00                 | 35.71                | 64.29               |

(a)

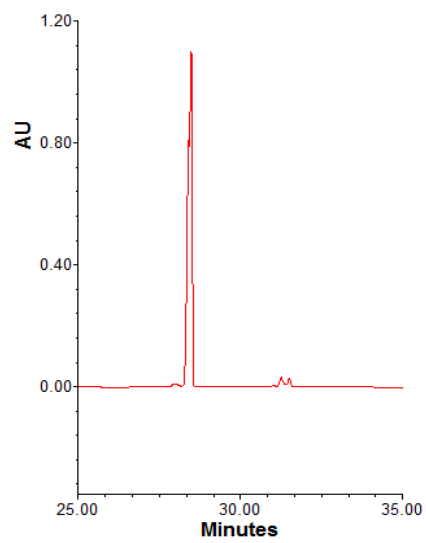

(b)

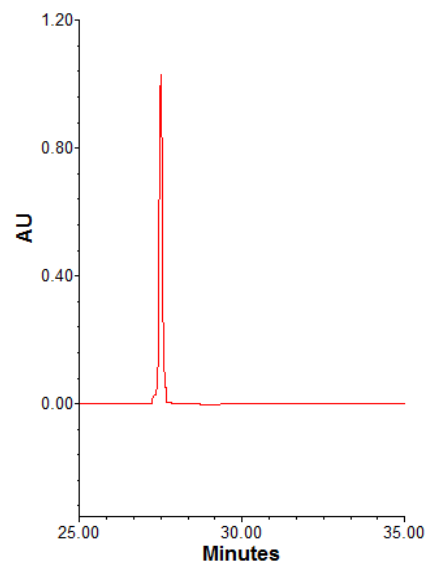

(c)

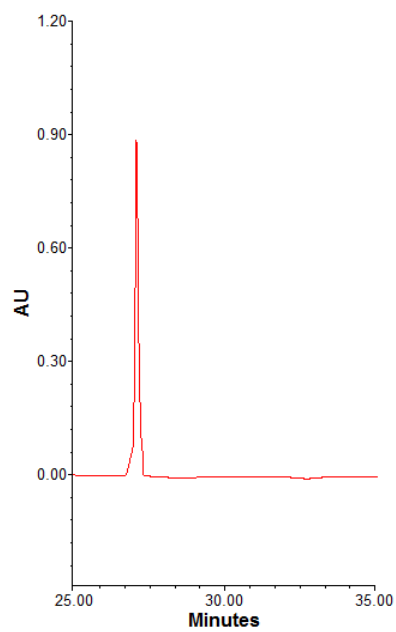

(d)

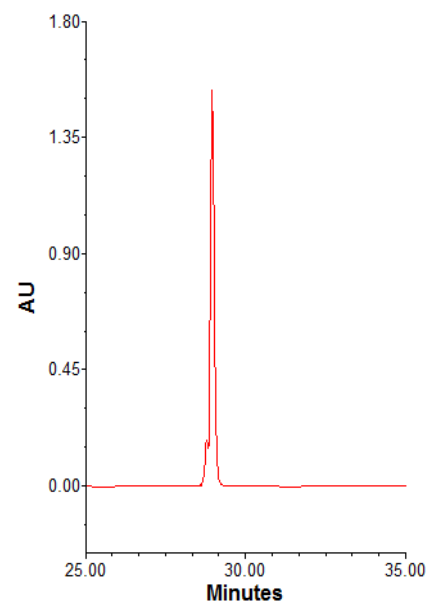

**Figure S1:** RP-HPLC chromatograms of Chenopodin-derived peptides. Purified synthetic peptides (a) Chen1, (b) Chen2, (c) ChenR and (d) ChenW elute between 26 and 29 min.
